# Supplementary material for: Symmetric dimethylarginine (SDMA) outperforms asymmetric dimethylarginine (ADMA) and other methylarginines as predictor of renal and cardiovascular outcome in non-dialysis chronic kidney disease
Source: Springer Nature journal article supplement (doi:10.1007/s00392-017-1172-4), 2017-11-03
Supplement: MOESM1 [file 15189826]

**Figure X1: Typical chromatogram of ADMA and SDMA in plasma, depicting the MS/MS transitions of the analytes together with the stable isotope labelled internal standards.**

**
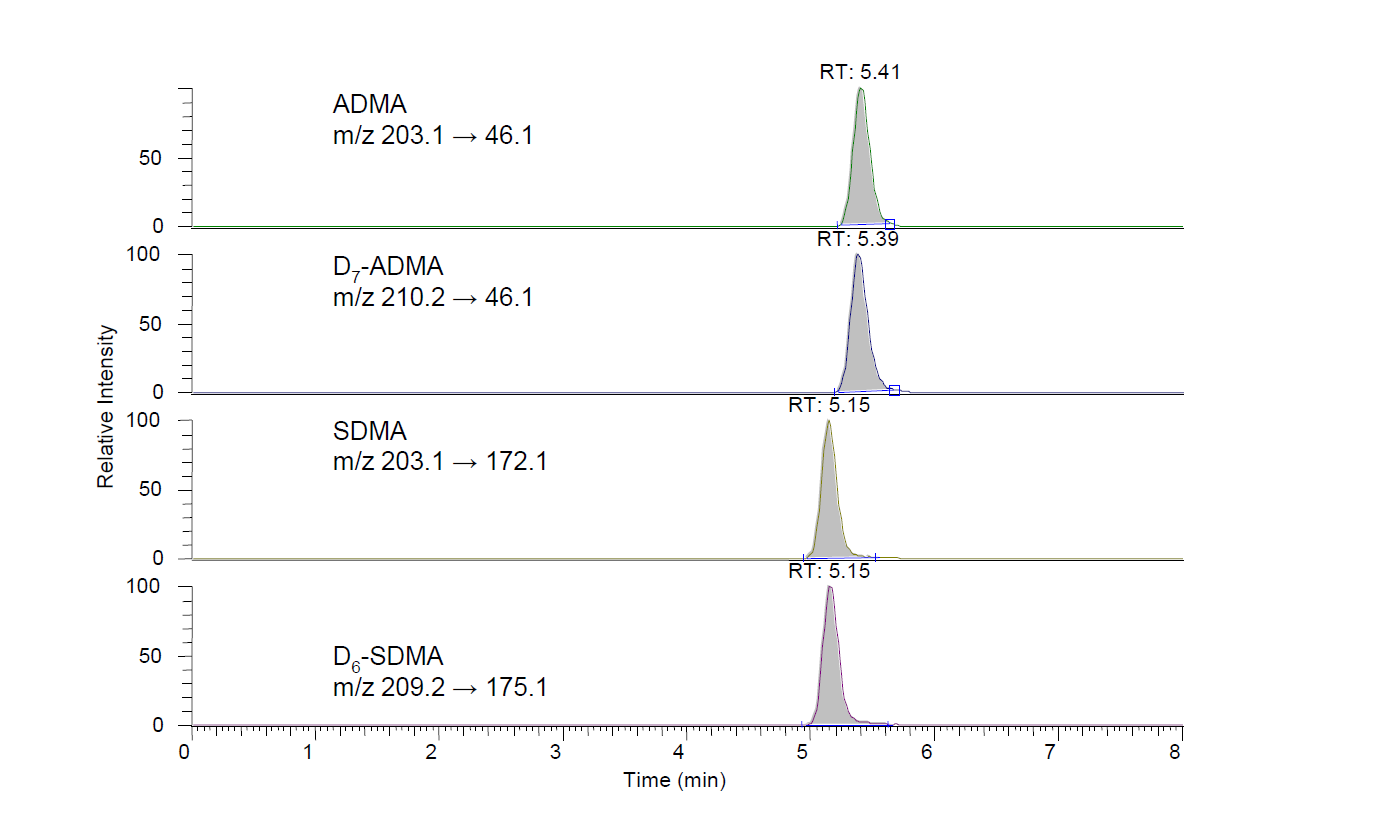
**

**Figure X2: Typical chromatogram of LNMMA and its internal standard D6-SDMA, depicting the MS3 transitions of the analytes**

**Figure X3: Typical chromatogram of Ac-ADMA and Ac-SDMA in plasma and their corresponding internal standards D6-Ac-SDMA and D7-Ac-ADMA, depicting the MS/MS transitions of the analytes**

| **Table S1: Plasma levels of methylarginines after stratification for gender, cardiovascular risk factors and medication** | | | | | | |
| --- | --- | --- | --- | --- | --- | --- |
|  |  | **ADMA** | **SDMA** | **LNMMA** | **AcADMA** | **AcSDMA** |
| **gender** [female] | **yes (**n = 309) | 0.50 [0.45; 0.55] | 0.72 [0.58; 0.89] | 52.35 [47.02; 58.47] | 1.02[0.68; 1.90] | 6.84 [3.14; 16.35] |
| **no (**n = 219) | 0.49 [0.44; 0.55] | 0.74 [0.60; 1.06] | 52.21 [46.74; 59.02] | 1.36 [0.79; 2.34] | 9.66 [3.94; 20.89] |
| **p** | 0.486 | **0.001** | 0.939 | **0.025** | 0.217 |
| **diabetes mellitus** | **yes (**n = 205) | 0.50 [0.44; 0.56] | 0.73 [0.57; 0.99] | 52.85 [47.46; 60.30] | 1.22 [0.73; 2.25] | 8.11 [3.49; 18.06] |
| **no (**n = 323) | 0.49 [0.45; 0.55] | 0.72 [0.60; 0.98 ] | 52.06 [46.63; 58.27] | 1.28 [0.74; 2.13] | 8.70 [3.60; 19.43] |
| **p** | 0.314 | 0.676 | **0.028** | 0.856 | 0.422 |
| **current smoker** | **yes (**n = 55) | 0.51 [0.47; 0.55] | 0.69 [0.55; 1.01] | 54.48 [47.25; 60.73] | 1.11 [0.72; 2.18] | 7.26 [3.33; 17.05] |
| **no (**n = 473) | 0.49 [0.44; 0.55] | 0.73 [0.59; 0.98] | 52.14 [46.82; 58.57] | 1.26 [0.74; 2.16] | 8.63 [3.61; 19.38] |
| **p** | 0.257 | 0.628 | 0.371 | 0.198 | **0.009** |
| **prevalent CVD** | **yes (**n = 168) | 0.50 [0.45; 0.57] | 0.77 [0.61; 1.03] | 52.65 [46.97; 58.59] | 1.37 [0.79; 2.57] | 9.73 [4.08; 22.24] |
| **no (**n = 360) | 0.49 [0.44; 0.55] | 0.70 [0.59; 0.98] | 52.07 [46.81; 58.96] | 1.17 [0.72; 2.02] | 7.98 [3.24; 16.94] |
| **p** | **0.044** | 0.163 | 0.262 | **0.019** | 0.405 |
| **ACE inhibitors** | **yes (**n = 189) | 0.49 [0.43; 0.54] | 0.72 [0.61; 0.98] | 51.03 [45.43; 57.77] | 1.23 [0.74; 2.12] | 8.94 [3.62; 19.41] |
| **no (**n = 339) | 0.50 [0.45; 0.56] | 0.72 [0.58; 0.98] | 52.91 [47.33; 59.72] | 1.26 [0.74; 2.18] | 8.20 [3.51; 18.62] |
| **p** | **0.016** | 0.969 | **0.005** | 0.778 | 0.757 |
| **ARB** | **yes (**n = 268) | 0.49 [0.44; 0.55] | 0.71 [0.58; 0.99] | 52.07 [46.81; 58.55] | 1.28 [0.74; 2.02] | 8.37 [3.75; 17.07] |
| **no (**n = 260) | 0.50 [0.45; 0.56] | 0.74 [0.61; 0.98] | 52.61 [46.97; 59.04] | 1.19 [0.73; 2.30] | 8.48 [3.49; 21.14] |
| **p** | 0.576 | 0.209 | 0.680 | 0.337 | 0.431 |
| **statin** | **yes (**n = 273) | 0.50 [0.45; 0.55] | 0.75 [0.61; 0.98] | 52.35 [47.12; 58.74] | 1.28 [0.75; 2.25] | 9.18 [3.78; 21.03] |
| **no (**n = 255) | 0.49 [0.44; 0.56] | 0.69 [0.57; 0.98] | 52.10 [46.45; 58.75] | 1.21 [0.73; 2.02] | 7.93 [3.24; 17.05] |
| **p** | 0.740 | 0.387 | 0.515 | 0.162 | 0.308 |
| **EPO** | **yes (**n = 13) | 0.52 [0.46; 0.56] | 1.21 [0.92; 1.40] | 49.92 [42.52; 58.50] | 2.76 [1.02; 5.57] | 17.05 [8.90; 99.00] |
| **no (**n = 515) | 0.49 [0.44; 0.55] | 0.72 [0.59; 0.98] | 52.35 [46.85; 58.75] | 1.23 [0.73; 2.13] | 8.27 [3.47; 18.57] |
| **p** | 0.885 | **< 0.001** | 0.363 | 0.052 | **0.049** |
| **native**  **vitamin D** | **yes (**n = 239) | 0.50 [0.45; 0.56] | 0.78 [0.61; 1.04] | 52.14 [46.92; 59.83] | 1.33 [0.77; 2.31] | 9.29 [3.97; 20.79] |
| **no (**n = 289) | 0.49 [0.44; 0.55] | 0.70 [0.58; 0.93] | 52.53 [46.63; 58.47] | 1.18 [0.71; 1.99] | 7.42 [3.17; 17.26] |
| **p** | 0.134 | 0.086 | 0.535 | 0.102 | **0.032** |
| **oral iron** | **yes (**n = 12) | 0.55 [0.52; 0.58] | 0.86 [0.71; 1.20] | 55.12 [49.61; 62.78] | 1.87 [1.33; 2.80] | 15.45 [8.00; 19.40] |
| **no (**n = 516) | 0.49 [0.44; 0.55] | 0.72 [0.59; 0.98] | 52.22 [46.81; 58.72] | 1.23 [0.74; 2.15] | 8.27 [3.52; 19.11] |
| **p** | **0.013** | 0.195 | 0.265 | 0.768 | 0.943 |
| **intravenous iron** | **yes (**n = 7) | 0.52 [0.45; 0.59] | 1.21 [0.84; 1.36] | 51.45 [49.20; 59.79] | 1.96 [1.06; 3.34] | 16.35 [7.93; 19.93] |
| **no (**n = 521) | 0.49 [0.44; 0.55] | 0.72 [0.59; 0.98] | 52.33 [46.82; 58.74] | 1.23 [0.74; 2.15] | 8.32 [3.52; 19.04] |
| **p** | 0.423 | **0.029** | 0.659 | 0.090 | 0.230 |

Indicated are median and interquartile range (IQR, 25th—75th percentile). ADMA = asymmetric dimethylarginine; SDMA = symmetric dimethylarginine; AcADMA = acetylated ADMA, AcSDMA = acetylated SDMA; LNMMA = L-NG-monomethylarginine; prevalent CVD = prevalent cardiovascular disease; ACE inhibitors = angiotension converting enzyme inhibitors; ARB = angiotensin II receptor antagonists; EPO = erythropoietin stimulating agents.

| **Table S2:** Cox models end point: ASCVD (incident cardiovascular events or cardiovascular mortality) | | | | | | | | |
| --- | --- | --- | --- | --- | --- | --- | --- | --- |
| Exposure variable | Model 1 | | Model 2 | | Model 3 | | Model 4 | |
| HR (95 % CI) *P* value | | HR (95 % CI) *P* value | | HR (95 % CI) *P* value | | HR (95 % CI) *P* value | |
| **Categorized predictors** |  |  |  |  |  |  |  |  |
| ADMA [µmol/l] |  |  |  |  |  |  |  |  |
| *Second tertile* | 0.829 (0.512 - 1.342) | 0.446 | 0.687 (0.423 - 1.116) | 0.129 | 0.631 (0.388 - 1.026) | 0.063 | 0.717 (0.436 - 1.178) | 0.189 |
| *Third tertile* | 1.615 (1.064 - 2.451) | **0.024** | 0.899 (0.581 - 1.391) | 0.633 | 0.796 (0.511 - 1.241) | 0.314 | 0.739 (0.464 - 1.175) | 0.201 |
| SDMA [µmol/l] |  |  |  |  |  |  |  |  |
| *Second tertile* | 2.076 (1.139 – 3.784) | **0.017** | 1.225 (0.631 - 2.378) | 0.550 | 1.310 (0.680 - 2.524) | 0.419 | 1.766 (0.890 – 3.504) | 0.104 |
| *Third tertile* | 5.065 (2.948 – 8.702) | **< 0.001** | 1.480 (0.651 – 3.363) | 0.349 | 1.554 (0.696 - 3.470) | 0.282 | 2.456(1.092 – 5.524) | **0.030** |
| AcADMA [nmol/l] |  |  |  |  |  |  |  |  |
| *Second tertile* | 1.187 (0.708 - 1.993) | 0.516 | 0.663 (0.376 - 1.166) | 0.153 | 0.638 (0.361 - 1.128) | 0.122 | 0.729 (0.418 - 1.273) | 0.267 |
| *Third tertile* | 2.661 (1.684 – 4.205) | **< 0.001** | 0.899 (0.501 – 1.612) | 0.721 | 0.855 (0.474 - 1.545) | 0.604 | 0.893 (0.493 - 1.618) | 0.710 |
| AcSDMA [nmol/l] |  |  |  |  |  |  |  |  |
| *Second tertile* | 1.857 (1.077 - 3.200) | **0.026** | 1.134 (0.634 – 2.029) | 0.671 | 1.109 (0.618 - 1.988) | 0.729 | 1.134 (0.634 – 2.029) | 0.671 |
| *Third tertile* | 3.496 (2.114 – 5.779) | **< 0.001** | 1.056 (0.546 – 2.042) | 0.871 | 1.048 (0.537 – 2.044) | 0.891 | 1.246 (0.640 - 2.424) | 0.518 |
| LNMMA [nmol/l]  *Second tertile*  *Third tertile* | 0.725 (0.460 – 1.141)  1.108 (0.732 – 1.678) | 0.165  0.626 | 0.727 (0.461 – 1.145)  0.870 (0.573 – 1.320) | 0.169  0.513 | 0.722 (0.456 – 1.144)  0.822 (0.541 – 1.248) | 0.165  0.358 | 0.710 (0.446 – 1.131)  0.604 (0.390 – 0.935) | 0.149  **0.024** |
| **Continuous predictors** |  |  |  |  |  |  |  |  |
| log ADMA [µmol/l] | 75.419 (6.184 – 919.808) | **0.001** | 1.414 (0.100 – 20.016) | 0.798 | 0.651 (0.043 – 9.922) | 0.758 | 0.268 (0.016 – 4.375) | 0.268 |
| log SDMA [µmol/l] | 30.262 (11.018 – 83.116) | **< 0.001** | 0.580 (0.081 – 4.134) | 0.587 | 0.549 (0.073 – 4.135) | 0.561 | 1.763 (0.228 – 13.639) | 0.587 |
| log AcADMA [nmol/l] | 3.727 (2.232 – 6.224) | **< 0.001** | 0.994 (0.508 – 1.947) | 0.986 | 0.932 (0.470 – 1.849) | 0.840 | 0.805 (0.395 – 1.640) | 0.549 |
| log AcSDMA [nmol/l] | 2.404 (1.697 – 3.404) | **< 0.001** | 0.808 (0.498 - 1.312) | 0.389 | 0.838 (0.506 - 1.388) | 0.492 | 0.958 (0.566 - 1.622) | 0.873 |
| log LNMMA [nmol/l] | 14.272 (1.148 – 177.501) | **0.039** | 1.997 (0.168 – 23.781) | 0.584 | 0.999 (0.082 – 12.212) | 1.000 | 0.246 (0.019 – 3.110) | 0.278 |
| Model 1 is the univariate analysis. Model 2 is adjusted for estimated glomerular filtration rate (eGFR) according to the CKD-EPIcrea-cys equation and log albuminuria. Model 3 is adjusted for eGFR, log albuminuria, age and sex. Model 4 is adjusted for eGFR, log albuminuria, age, sex, diabetes mellitus, current smoker, total cholesterol, prevalent cardiovascular events, body mass index (BMI) and systolic blood pressure (BPsys). HR: hazard ratio, 95 % CI = 95 % confidence interval, ADMA = asymmetric dimethylarginine, SDMA = symmetric dimethylarginine, AcADMA = acetylated ADMA, AcSDMA = acetylated SDMA; LNMMA = monomethylarginine.  Reference is the first tertile. | | | | | | | | |

| **Table S3:** Cox models end point: CKD progression (halving of estimated glomerular filtration rate or renal replacement therapy) | | | | | | | | |
| --- | --- | --- | --- | --- | --- | --- | --- | --- |
| Exposure variable | Model 1 | | Model 2 | | Model 3 | | Model 4 | |
| HR (95 % CI) *P* value | | HR (95 % CI) *P* value | | HR (95 % CI) *P* value | | HR (95 % CI) *P* value | |
| **Categorized predictors** |  |  |  |  |  |  |  |  |
| ADMA [µmol/l] |  |  |  |  |  |  |  |  |
| *Second tertile* | 1.024 (0.559 - 1.875) | 0.940 | 0.854 (0.463 - 1.576) | 0.613 | 0.863 (0.468 - 1.593) | 0.639 | 0.897 (0.467 - 1.720) | 0.743 |
| *Third tertile* | 2.096 (1.223 - 3.594) | **0.007** | 0.897 (0.510 - 1.576) | 0.706 | 0.888 (0.504 – 1.565) | 0.682 | 1.074 (0.589 – 1.959) | 0.816 |
| SDMA [µmol/l] |  |  |  |  |  |  |  |  |
| *Second tertile* | 2.875 (0.778 – 10.622) | 0.113 | 1.549 (0.397 – 6.039) | 0.528 | 1.527 (0.392 – 5.955) | 0.542 | 1.526 (0.391 – 5.961) | 0.543 |
| *Third tertile* | 27.793 (8.736 – 88.421) | **< 0.001** | 3.936 (0.961 – 16.117) | 0.057 | 3.748 (0.909 – 15.447) | 0.067 | 3.820 (0.932 – 15.652) | 0.063 |
| AcADMA [nmol/l] |  |  |  |  |  |  |  |  |
| *Second tertile* | 2.216 (1.015 - 4.840) | **0.046** | 0.647 (0.268 – 1.561) | 0.332 | 0.660 (0.275 – 1.582) | 0.351 | 0.648 (0.263 – 1.593) | 0.344 |
| *Third tertile* | 6.318 (3.098 – 12.884) | **< 0.001** | 0.776 (0.319 – 1.893) | 0.578 | 0.738 (0.303 – 1.793) | 0.502 | 0.719 (0.286 – 1.806) | 0.483 |
| AcSDMA [nmol/l] |  |  |  |  |  |  |  |  |
| *Second tertile* | 2.806 (1.113 – 7.073) | **0.029** | 1.010 (0.376 – 2.716) | 0.984 | 1.053 (0.394 – 2.814) | 0.918 | 1.004 (0.364 – 2.767) | 0.994 |
| *Third tertile* | 10.635 (4.573 - 24.732) | **< 0.001** | 1.212 (0.429 – 3.422) | 0.716 | 1.202 (0.427 – 3.381) | 0.727 | 1.333 (0.450 – 3.945) | 0.604 |
| LNMMA [nmol/l]  *Second tertile*  *Third tertile* | 0.530 (0.284 – 0.990)  1.586 (0.962 – 2.617) | **0.046**  0.071 | 0.563 (0.300 - 1.057)  1.086 (0.657 – 1.798) | 0.074  0.747 | 0.608 (0.321 - 1.151)  1.076(0.650 – 1.780) | 0127  0.776 | 0.677 (0.350 – 1.312)  1.146 (0.668 – 1.967) | 0.248  0.620 |
| **Continuous predictors** |  |  |  |  |  |  |  |  |
| log ADMA [µmol/l] | 801.188 (30.805 – 20837.681) | **<0.001** | 1.234 (0.037 – 41.055) | 0.906 | 0.998 (0.031 – 31.744) | 0.999 | 2.466 (0.074 – 82.245) | 0.614 |
| log SDMA [µmol/l] | 1533.254 (419.701 – 5601.289) | **<0.001** | 24.721 (2.115 – 288.954) | **0.011** | 14.790 (1.150 – 190.214) | **0.039** | 12.804 (0.875 – 187.363) | 0.063 |
| log AcADMA [nmol/l] | 10.254 (5.609 – 18.748) | **<0.001** | 1.486 (0.646 – 3.421) | 0.351 | 1.430 (0.611 – 3.347) | 0.410 | 1.177 (0.492 – 2.815) | 0.714 |
| log AcSDMA [nmol/l] | 6.118 (3.953 – 9.469) | **<0.001** | 1.249 (0.693 – 2.252) | 0.459 | 1.250 (0.689 – 2.268) | 0.463 | 1.088 (0.595 – 1.989) | 0.785 |
| log LNMMA [nmol/l] | 189.991 (7.237 – 4987.795) | **0.002** | 6.441 (0.304 – 135.218) | 0.232 | 4.829 (0.223 – 104.439) | 0.315 | 5.860 (0.252 – 136.358) | 0.271 |
| Model 1 is the univariate analysis. Model 2 is adjusted for estimated glomerular filtration rate (eGFR) according to the CKD-EPIcrea-cys equation and log albuminuria. Model 3 is adjusted for eGFR, log albuminuria, age and sex. Model 4 is adjusted for eGFR, log albuminuria, age, sex, diabetes mellitus, current smoker, total cholesterol, prevalent cardiovascular events, body mass index (BMI) and systolic blood pressure (BPsys). HR: hazard ratio, 95 % CI = 95 % confidence interval, ADMA = asymmetric dimethylarginine, SDMA = symmetric dimethylarginine, AcADMA = acetylated ADMA, AcSDMA = acetylated SDMA; LNMMA = monomethylarginine.  Reference is the first tertile. | | | | | | | | |

| **Table S4: Linear regression analysis for the methylarginines** | | | | |
| --- | --- | --- | --- | --- |
| independent variable | **log SDMA** | | **log ADMA** | |
|  | HR (95 % CI) | *P* value | HR (95 % CI) | *P* value |
| eGFR [MDRD] | -0.008 (-0.008 - -0.007) | **< 0.001** | -0.001 (-0.002 - -0.001) | **< 0.001** |
| log albuminuria | 0.026 (0.016 – 0.035) | **< 0.001** | 0.006 (-0.001 – 0.013) | 0.101 |
| gender | -0.044 (-0.060 - -0.027) | **< 0.001** | 0.004 (-0.007 – 0.016) | 0.465 |
| age | 0.001 (0.001 – 0.002) | **0.001** | 0.001 (0.001 – 0.002) | **< 0.001** |
| diabetes mellitus | -0.015 (-0.032 – 0.003) | 0.103 | -0.003 (-0.016 – 0.010) | 0.650 |
| current smoking | 0.010 (-0.016 – 0.036) | 0.456 | 0.027 (0.008 – 0.046) | **0.006** |
| total cholesterol | 0.000 (0.000 – 0.000) | 0.055 | 0.000 (0.000 – 0.000) | **0.033** |
| prevalent CVD | -0.023 (-0.042 - -0.004) | **0.018** | 0.000 (-0.014 – 0.013) | 0.949 |
| BMI | -0.003 (-0.004 - -0.001) | **< 0.001** | 0.000 (-0.001 – 0.002) | 0.510 |
| BP sys | -7.085^-6 (0.000 – 0.000) | 0.968 | 4.158^-5 (0.000 – 0.000) | 0.743 |
| native vitamin D intake | 0.011 (-0.006 – 0.027) | 0.199 | 0.007 (-0.005 – 0.018) | 0.268 |
| active vitamin D intake | 0.008 (-0.025 – 0.041) | 0.646 | -0.006 (-0.030 – 0.018) | 0.609 |
| log CRP | 0.008 (-0.010 – 0.026) | 0.355 | -0.002 (-0.015 – 0.011) | 0.771 |
| statin intake | -0.004 - -0.021 – 0.014) | 0.685 | -0.010 (-0.023 – 0.003) | 0.122 |

| independent variable | **log AcSDMA** | | **log AcADMA** | |
| --- | --- | --- | --- | --- |
|  | HR (95 % CI) | *P* value | HR (95 % CI) | *P* value |
| eGFR [MDRD] | -0.019 (-0.021 - -0.017) | **< 0.001** | -0.011 (-0.013 - -0.010) | **< 0.001** |
| log albuminuria | 0.035 (-0.001 – 0.072) | 0.056 | 0.021 (-0.006 – 0.048) | 0.120 |
| gender | -0.116 (-0.178 - -0.054) | **< 0.001** | -0.111 (-0.157 - -0.066) | **< 0.001** |
| age | 0.003 (0.000 – 0.006) | **0.025** | 0.003 (0.001 – 0.005) | **0.003** |
| diabetes mellitus | -0.040 (-0.108 - 0.027) | 0.239 | - 0.029 (-0.079 – 0.020) | 0.243 |
| current smoking | 0.008 (-0.092 – 0.107) | 0.881 | 0.011 (-0.062 – 0.083) | 0.772 |
| total cholesterol | 0.001 (0.000 – 0.002) | 0.051 | 0.000 (0.000 – 0.001) | 0.159 |
| prevalent CVD | -0.021(-0 093 – 0.051) | 0.561 | 0.004 (-0.048 – 0.057) | 0.876 |
| BMI | -0.005 (-0.011 – 0.000) | 0.071 | -0.001 (-0.006 – 0.003) | 0.543 |
| BP sys | -0.001 (-0.002 – 0.000) | 0.190 | -0.001 (-0.002 – 0.000) | 0.238 |
| native vitamin D intake | 0.046 (-0.016 – 0.107) | 0.143 | 0.025 (-0.019 – 0.070) | 0.267 |
| active vitamin D intake | -0.010 (-0.135 – 0.116) | 0.880 | -0.001 (-0.093 – 0.091) | 0.976 |
| log CRP | 0.053 (-0.015 – 0.121) | 0.127 | 0.055 (0.005 – 0.105) | **0.030** |
| statin intake | 0.034 (-0.033 – 0.101) | 0.320 | 0.009 (-0.040 – 0.058) | 0.721 |

| independent variable | **log LNMMA** | |
| --- | --- | --- |
|  | HR (95 % CI) | *P* value |
| eGFR [MDRD] | 0.000 (-0.001 – 0.000) | 0.238 |
| log albuminuria | 0.011 (0.004 – 0.019) | **0.002** |
| gender | 0.002 (- 0.011 – 0.014) | 0.804 |
| age | 0.001 (0.001 – 0.002) | **< 0.001** |
| diabetes mellitus | 0.004 (-0.010 – 0.017) | 0.589 |
| current smoking | 0.015 (-0.005 – 0.035) | 0.139 |
| total cholesterol | 0.000 (0.000 -0.000) | **0.016** |
| prevalent CVD | -0.002 (-0.017 – 0.012) | 0.766 |
| BMI | 0.001 (-0.001 – 0.002) | 0.300 |
| BP sys | -1.211^-5 (0.000 – 0.000) | 0.928 |
| native vitamin D intake | 0.000 (-0.012 – 0.013) | 0.976 |
| active vitamin D intake | -0.002 (-0.028 – 0.023) | 0.868 |
| log CRP | -0.009 (-0.023 – 0.005) | 0.203 |
| statin intake | -0.007 (-0.021 – 0.006) | 0.301 |

Indicated are hazard ratios with 95 % confidence interval; eGFR = estimated glomerular filtration rate according to the MDRD equation; prevalent CVD = prevalent cardiovascular disease, BMI = body mass index, BP sys = systolic blood pressure, log CRP = log C-reactive protein.


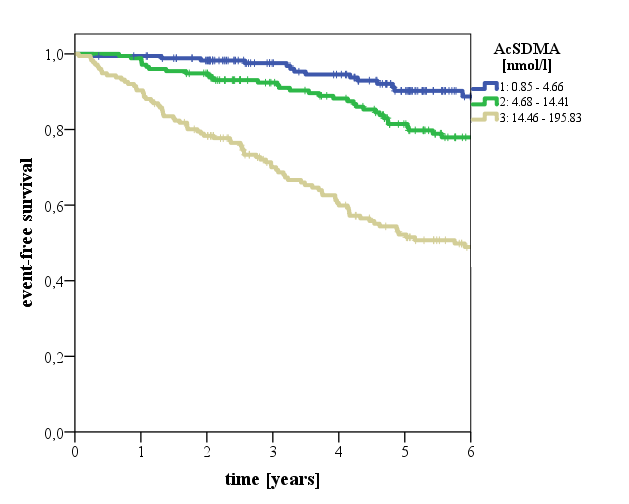

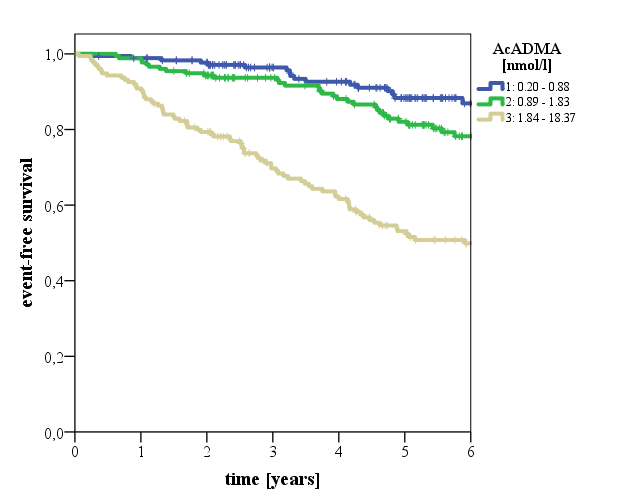

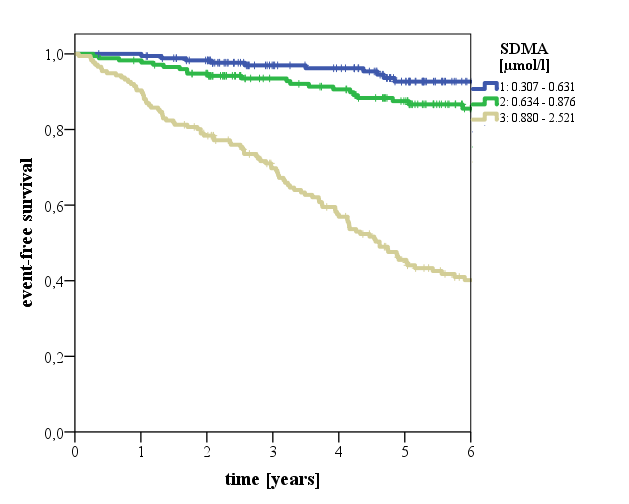

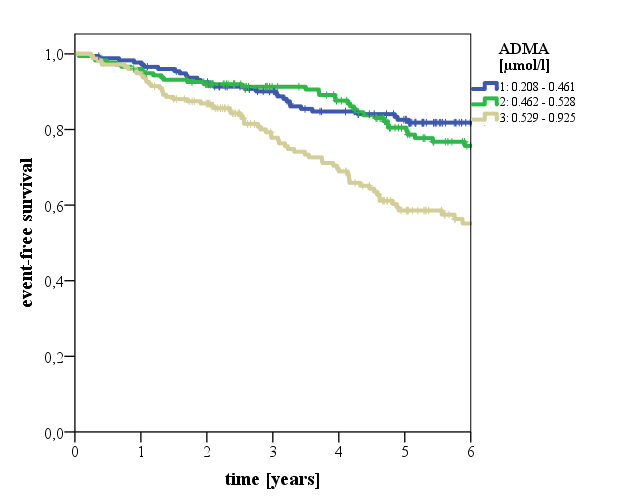

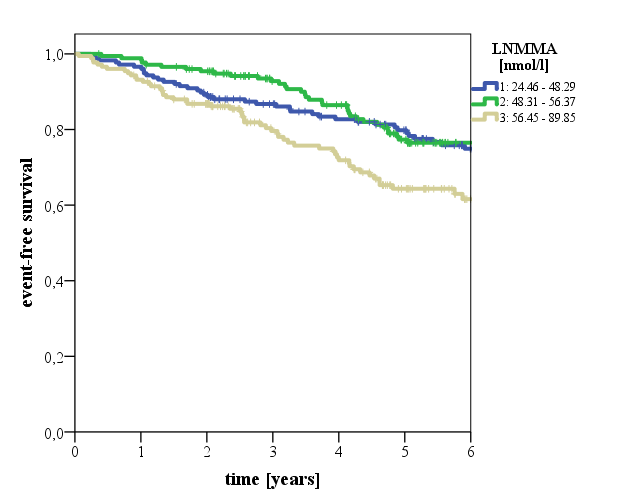


**p < 0.001**

**p < 0.001**

**p = 0.001**

**p < 0.001**

**p < 0.001**

**A**

**B**

**C**

**D**

**E**

**Figure S1:** Kaplan Meier analyses with subsequent Breslow test for CKD progression or all-cause death: high plasma levels of ADMA (A), SDMA (B), LNMMA (C), AcADMA (D) and AcSDMA (E) were all associated with lower event free survival.

| **Table S5:** Cox models end point: CKD progression or all-cause death | | | | | | | | |
| --- | --- | --- | --- | --- | --- | --- | --- | --- |
| Exposure variable | Model 1 | | Model 2 | | Model 3 | | Model 4 | |
| HR (95 % CI) *P* value | | HR (95 % CI) *P* value | | HR (95 % CI) *P* value | | HR (95 % CI) *P* value | |
| **Categorized predictors** |  |  |  |  |  |  |  |  |
| ADMA [µmol/l] |  |  |  |  |  |  |  |  |
| *Second tertile* | 1.172 (0.744 - 1.844) | 0.494 | 1.079 (0.684 - 1.703) | 0.743 | 1.009 (0.639 - 1.592) | 0.969 | 1.056 (0.660 - 1.691) | 0.819 |
| *Third tertile* | 2.370 (1.575 – 3.566) | **< 0.001** | 1.458 (0.960 – 2.215) | 0.077 | 1.259 (0.823 - 1.927) | 0.288 | 1.386 (0.897 – 2.140) | 0.141 |
| SDMA [µmol/l] |  |  |  |  |  |  |  |  |
| *Second tertile* | 2.102 (1.030 – 4.292) | **0.041** | 1.657 (0.785 – 3.497) | 0.185 | 1.561 (0.741 - 3.287) | 0.241 | 1.644 (0.776 – 3.482) | 0.195 |
| *Third tertile* | 12.306 (6.616 – 22.890) | **< 0.001** | 4.869 (2.202 – 10.764) | **< 0.001** | 4.102 (1.875 – 8.974) | **< 0.001** | 4.445 (2.029 – 9.704) | **< 0.001** |
| AcADMA [nmol/l] |  |  |  |  |  |  |  |  |
| *Second tertile* | 1.634 (0.954 – 2.800) | 0.074 | 0.896 (0.504 - 1.594) | 0.709 | 0.807 (0.451 - 1.444) | 0.470 | 0.838 (0.466 - 1.505) | 0.554 |
| *Third tertile* | 4.886 (3.031 – 7.877) | **< 0.001** | 1.560 (0.880 - 2.767) | 0.128 | 1.339 (0.752 – 2.384) | 0.321 | 1.398 (0.778 – 2.510) | 0.262 |
| AcSDMA [nmol/l] |  |  |  |  |  |  |  |  |
| *Second tertile* | 2.058 (1.158 – 3.656) | **0.014** | 1.268 (0.696 - 2.308) | 0.438 | 1.131 (0.618 – 2.067) | 0.690 | 1.142 (0.620 - 2.104) | 0.670 |
| *Third tertile* | 6.219 (3.700 – 10.452) | **< 0.001** | 1.840 (0.974 – 3.476) | 0.060 | 1.644 (0.873 – 3.097) | 0.124 | 1.786 (0.936 – 3.408) | 0.078 |
| LNMMA [nmol/l]  *Second tertile*  *Third tertile* | 0.745 (0.482 – 1.152)  1.648 (1.124 – 2.416) | 0.185  **0.011** | 0.793 (0.512 – 1.229)  1.406 (0.958 – 2.064) | 0.300  0.082 | 0.836 (0.536 – 1.305)  1.312 (0.892 – 1.930) | 0.431  0.168 | 0.838 (0.535 – 1.315)  1.303 (0.877 – 1.938) | 0.442  0.190 |
| **Continuous predictors** |  |  |  |  |  |  |  |  |
| logADMA | 709.075 (64.108 – 7842.805) | **< 0.001** | 14.530 (1.238 – 170.565) | **0.033** | 5.339 (0.426 – 66.883) | 0.194 | 7.132 (0.571 – 89.126) | 0.127 |
| log SDMA | 343.933 (133.542 – 885.788) | **< 0.001** | 31.472 (6.006 – 164.918) | < **0.001** | 17.816 (3.202 – 99.119) | **0.001** | 26.373 (4.420 – 157.370) | **< 0.001** |
| log AcADMA | 8.263 (5.267 – 12.963) | **< 0.001** | 2.432 (1.357 – 4.360) | **0.003** | 2.003 (1.116 – 3.594) | **0.020** | 1.903 (1.054 – 3.436) | **0.033** |
| log AcSDMA | 4.525 (3.279 – 6.246) | **< 0.001** | 1.553 (1.009 – 2.391) | **0.045** | 1.467 (0.958 – 2.247) | 0.078 | 1.482 (0.964 – 2.278) | 0.073 |
| log LNMMA | 159.112 (14.296 – 1770.838) | **< 0.001** | 27.713 (2.792 – 275.055) | **0.005** | 11.424 (1.149 – 113.569) | **0.038** | 10.152 (0.975 – 105.718) | 0.053 |
| Model 1 is the univariate analysis. Model 2 is adjusted for estimated glomerular filtration rate (eGFR) and log albuminuria. Model 3 is adjusted for eGFR, log albuminuria, age and sex. Model 4 is adjusted for eGFR, log albuminuria, age, sex, diabetes mellitus, current smoker, total cholesterol, prevalent cardiovascular events, body mass index (BMI) and systolic blood pressure (BPsys). HR: hazard ratio, 95 % CI = 95 % confidence interval, ADMA = asymmetric dimethylarginine, SDMA = symmetric dimethylarginine, AcADMA = acetylated ADMA, AcSDMA = acetylated SDMA; LNMMA = L-NG-monomethylarginine.  Reference is the first tertile. | | | | | | | | |


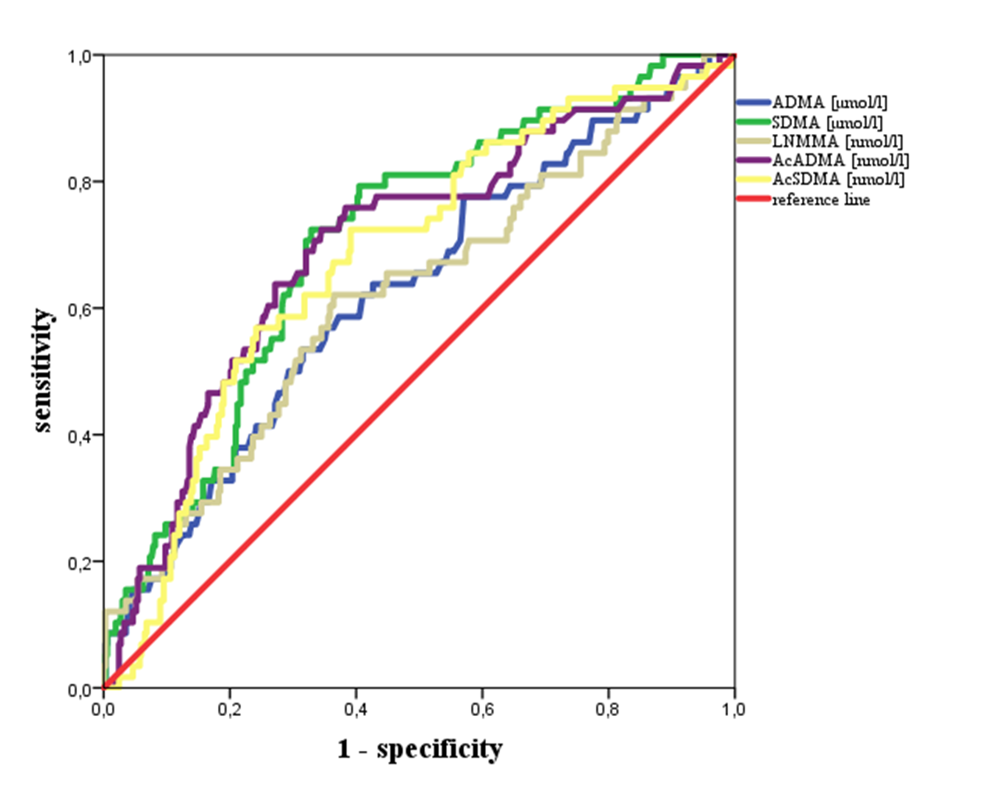


**Figure S2:** ROC analyses for CKD progression or all-cause death; AUC [ADMA] = 0.625; AUC [SDMA] = 0.706; AUC [LNMMA] = 0.619; AUC [AcADMA] = 0.699; AUC [AcSDMA] = 0.680.
